# Supplementary material
Source: PubMed Central journal article supplement (PMC6842326)
Supplement: NIHMS1056226-supplement-Supp_Table_2.pdf [file NIHMS1056226-supplement-Supp_Table_2.pdf]

Online Resource 2. Final factor loadings derived from the MrOS population (showing only those with absolute value  $\geq 0.20$  for simplicity)

| Food                    | Western | Prudent |
|-------------------------|---------|---------|
| Bagels, English muffins | 0.27    |         |
| Baked beans, pintos     |         | 0.43    |
| Beef roast, steak       | 0.33    |         |
| Beef, fat trimmed off   | 0.21    |         |
| Biscuits, muffins       | 0.29    |         |
| Broccoli                |         | 0.56    |
| Butter                  | 0.41    |         |
| Carrots                 |         | 0.61    |
| Cheese                  | 0.37    |         |
| Cheese dishes           | 0.42    |         |
| Chocolate candy         | 0.35    |         |
| Brewed coffee           | 0.23    |         |
| Cookies                 | 0.35    |         |
| Coleslaw, cabbage       |         | 0.44    |
| Corn                    | 0.24    | 0.38    |
| Crackers                | 0.27    |         |
| Dark bread              |         | 0.31    |
| Doughnuts, pastries     | 0.40    |         |
| Eggs                    | 0.36    |         |
| Fried chicken           | 0.30    |         |
| French fries            | 0.51    |         |
| Green beans             | 0.21    | 0.49    |
| Gravy                   | 0.42    |         |
| Hamburger               | 0.52    |         |
| Cooked cereal           |         | 0.26    |
| Hot dogs                | 0.49    |         |
| Ice cream               | 0.42    |         |
| Ham, lunch meats        | 0.43    |         |
| Liver                   | 0.20    |         |
| Margarine               | 0.34    |         |
| Mayonnaise              | 0.38    |         |
| Mixed dishes with beef  | 0.31    | 0.22    |
| Fish (not fried)        |         | 0.43    |
| Peanuts, other nuts     |         | 0.23    |
| Other soups             | 0.29    | 0.27    |
| Other vegetables        |         | 0.47    |
| Pies                    | 0.34    |         |
| Pork, fat trimmed       | 0.21    |         |
| Pork                    | 0.31    |         |
| Potatoes (not fried)    | 0.31    | 0.28    |
| Pizza                   | 0.37    |         |
| Rice                    |         | 0.32    |

|                         |      |      |
|-------------------------|------|------|
| Green salad             |      | 0.47 |
| Sausage                 | 0.44 |      |
| Soft drinks             | 0.26 |      |
| Shellfish               |      | 0.21 |
| Salad dressing          | 0.27 |      |
| Spaghetti, tomato sauce | 0.26 | 0.28 |
| Spinach                 |      | 0.50 |
| Sweet potatoes          |      | 0.32 |
| Salty snacks, chips     | 0.35 |      |
| Tofu                    |      | 0.36 |
| Raw tomatoes            |      | 0.43 |
| Vegetable soup          | 0.23 | 0.38 |
| White bread             | 0.37 |      |
| Whole milk              | 0.22 |      |
| Yogurt, frozen yogurt   |      | 0.30 |

## Dietary patterns and longitudinal change in bone mineral density in older men

Tara S. Rogers, PhD<sup>1</sup>, Stephanie Harrison, MPH<sup>2</sup>, Suzanne Judd, PhD<sup>3</sup>, Eric S. Orwoll, MD<sup>4</sup>, Lynn M. Marshall, ScD<sup>4</sup>, Jackilen Shannon, PhD<sup>4</sup>, Lisa Langsetmo, PhD<sup>5</sup>, Nancy E. Lane, MD<sup>1</sup> and James M. Shikany, DrPH<sup>3</sup>

### Affiliations:

1. Center for Musculoskeletal Health and Department of Internal Medicine, University of California at Davis, Sacramento, CA
2. California Pacific Medical Center Research Institute, San Francisco, CA
3. University of Alabama at Birmingham, Birmingham, AL
4. Oregon Health & Science University, Portland, OR
5. University of Minnesota Epidemiology and Community Health, Minneapolis, MN

Corresponding Author: Tara S. Rogers, Ph.D.

Email: [tsrogers@ucdavis.edu](mailto:tsrogers@ucdavis.edu)
