# Supplementary material
Source: PubMed Central journal article supplement (PMC6842326)
Supplement: NIHMS1056226-supplement-Supp_Table_3.pdf [file NIHMS1056226-supplement-Supp_Table_3.pdf]

Online Resource 3. Final factor loadings for dairy products derived from the MrOS population

| Food                  | Western | Prudent |
|-----------------------|---------|---------|
| Butter                | 0.41    | -0.11   |
| Cheese                | 0.37    | -0.07   |
| Cheese dishes         | 0.42    | 0.11    |
| Ice cream             | 0.42    | -0.09   |
| Yogurt, frozen yogurt | -0.13   | 0.30    |
| Nonfat milk           | -0.19   | 0.17    |
| 1% milk               | 0.03    | 0.02    |
| 2% milk               | 0.19    | -0.10   |
| Whole milk            | 0.22    | -0.10   |

## Dietary patterns and longitudinal change in bone mineral density in older men

Tara S. Rogers, PhD<sup>1</sup>, Stephanie Harrison, MPH<sup>2</sup>, Suzanne Judd, PhD<sup>3</sup>, Eric S. Orwoll, MD<sup>4</sup>, Lynn M. Marshall, ScD<sup>4</sup>, Jackilen Shannon, PhD<sup>4</sup>, Lisa Langsetmo, PhD<sup>5</sup>, Nancy E. Lane, MD<sup>1</sup> and James M. Shikany, DrPH<sup>3</sup>

### Affiliations:

1. Center for Musculoskeletal Health and Department of Internal Medicine, University of California at Davis, Sacramento, CA
2. California Pacific Medical Center Research Institute, San Francisco, CA
3. University of Alabama at Birmingham, Birmingham, AL
4. Oregon Health & Science University, Portland, OR
5. University of Minnesota Epidemiology and Community Health, Minneapolis, MN

Corresponding Author: Tara S. Rogers, Ph.D.

Email: [tsrogers@ucdavis.edu](mailto:tsrogers@ucdavis.edu)
